# Supplementary material for: Cattle T2T X Chromosome: Insights into Natural Neocentromere Evolution
Source: Research Square preprint supplement (doi:10.21203/rs.3.rs-6068440/v1), 2025-04-08
Supplement: Supplementary file 1 [file 490dc1e38d4eaa01eeca7952.docx]

# **Extended Data Figure**

**Extended Data Fig. 1. Telomere and X chromosome visualisation.** **a,** A bedgraph of the telomeric repeat signals at a 10-kb window of UOA_Wagyu_1 and ARS-UCD_2.0 using tidk0.2.0. The alternating gray shades delineate the boundaries of each chromosome. **b,** Moddotplot visualization of X chromosome. Black arrow indicates an example of a low sequence similarity repeat block. The X centromere specific repeat (red box) shows alignment to this region with sequence identity >90%, confirming the location the X centromere.

**Extended Data Fig. 2. Transposable elements in the X chromosome.** Location of transposable elements (TEs) in the comprehensive ab initio repeat pipeline (CARP) consensus sequences of the X centromere region, analyzed under 99% sequence similarity and a minimum length of 400 bp. This figure illustrates the eight consensus sequences identified within the 12 Mb centromere region. The yellow boxes indicate the consensus family specific to the X centromere, blue boxes indicate regions covered by transposable elements based on RepBase data, with arrows representing the direction of the matched transposable element sequences. Arrows pointing to the right indicate a 5' to 3' direction, while those pointing left indicate the reverse. Three consensus sequences are chimeric, with two fully covered by TEfragments aligned in the same direction. These chimeric sequences, originating from diverse transposons, display unique structural characteristics.

**Extended Data Fig. 3. Ratio of ratios for observed (Obs) and expected (Exp) CpGs compared to observed and expected TpGs.** Scatterplot showing the ratios of (Obs_CpG/Exp_CpG) / (Obs_TpG/Exp_TpG) for each centromere. BTA20 is missing due to not being able to confidently identify the centromere. The Y-axis denotes the ratio and the X-axis denotes the chromosomes.

**Extended Data Fig. 4. Comparison of the Wagyu X and Y cattle chromosome pseudoautosomal regions (PARs) and adjacent sequence.** The blue dots are forward alignment, and red dots are reversed alignment. The x-axis is X chromosome and y-axis is Y chromosome. The cattle PAR on X is between X: 166757707-173598413 (reversed) and Y: 20023-6819277 according to the alignment. The X and Y chromosome PAR genes (dark blue) share the same gene content and gene order. Gene families *OBP* and *BDA20* are highlighted in green and yellow. New gene *PRP* identified on Y chromosome is highlighted in red. *SHROOM2* is located distal to the pseudoautosomal boundary (PAB) on the BTAX, which is found inverted on the Y chromosome X-d1 region.

**Extended Data Fig. 5. The alignment plot between X and Y chromosomes.** The PAR region aligns at both termini of the X and Y chromosome but at opposite ends (q-arm vs p-arm). Blue color indicates opposite orientation (-) whereas green indicates forward orientation (+).

**Extended Data Fig. 6.** **Gene expression.** **a,** Testes-expressed genes in sex chromosome for PAR regions across species. The genes are listed according to the order of cattle genes. Btau is *Bos taurus*, Hsap is *Homo sapiens*, Ptro is *Pan troglodytes*, Ggor is *Gorilla gorilla* and Ppyg is *Pongo pygmaeus*. **b,** The expression of *BDA20* (ENSBTAG00000016820) in cattle tissues grouped for mature and immature cattle. We grouped the mature cattle equal to or older than one year old. There were 3107 samples of 91 types of tissues on the boxplot.

**Extended Data Fig. 7. Pathway enrichment analysis. a,** Pathway enrichment for genes within the X centromere. **b,** Pathway enrichment of genes that overlap with Wagyu-specific hotspots. Enriched terms identified among the 509 protein-coding genes that overlap with Wagyu-specific structural variant hotspots. Adjusted P value of Olfactory transduction = 0.04.
