# Supplementary material for: Cattle T2T X Chromosome: Insights into Natural Neocentromere Evolution
Source: Research Square preprint supplement (doi:10.21203/rs.3.rs-6068440/v1), 2025-04-08
Supplement: Supplementary file 3 [file bb16caa1f75d8c8e349e4719.xlsx]

## Sheet: S1_AssemblyRun
Supplementary Table 1. Different runs of Verkko and hifiasm with different coverage and sequencing reads
Run number	Breed	Option	Coverage HiFi	Coverage ONT as UL	Coverage HERRO corrected ONT	merqury QV	switch-error rate	T2T chr	TgapT chr	1T chr	no T	T2T chr	assembly size (Gb)	contig number	N50 (Mb)	q-arm telomere count (average)	p-arm telomere count (average)	q-arm telomere length bp (average)	p-arm telomere length bp (average)
run1	Wagyu	Verkko2 C2	58.1	106.9	-	51.8963	0.00354149	2	0	14	14	17, X	3.1082	301	110.972	448.929	272	3066.67	1933.33
run2	Wagyu	Verkko2 C0	58.1	106.9	-	48.6101	0.00370155	3	1	18	8	9, 17, X	3.11145	301	110.984	907.381	1137	5963.64	7650
run3	Wagyu	Verkko2 C2	58.1	121.2	-	52.184	0.00355798	2	0	14	14	17, X	3.11244	302	110.962	433.714	272	3000	1933.33
run4	Wagyu	Verkko2 C0	58.1	121.2	-	49.3376	0.00368379	3	1	17	9	9, 17, X	3.11552	302	110.966	840.65	1137	5638.1	7650
run5	Wagyu	Verkko2 C0 herro run1	58.1	121.2	57	54.3015	0.00361655	5	1	19	5	9, 10, 21, 23, X	3.14156	425	111.091	2222.54	1660.57	13841.7	10971.4
run6	Wagyu	Verkko2 C2 herro run1	58.1	121.2	57	57.17	0.00356461	4	1	19	6	10, 21, 23, X	3.13477	425	111.082	2132.14	1718.5	13043.5	10033.3
run7	Wagyu	Verkko2 C2 herro run2	58.1	121.2	99	53.9899	0.00359326	3	3	19	5	9, 10, 17	3.18421	1070	95.2755	2352.14	1856.5	14321.7	11125
run8	Wagyu	Verkko2 C0 herro run2	58.1	121.2	99	52.2475	0.00368264	3	3	20	4	9, 10, 17	3.20854	1079	87.0794	2429.22	2011	14783.3	12075
run1	Wagyu	hifiasm	58.1	121.2	57	58.82	0.00377593	2	1	18	9	10, 17	3.1645	354	93.5078	2612.33	2298.3	14181	12733.3
run2	Wagyu	hifiasm	58.1	121.2	-	55.37	0.00381492	1	0	18	12	X	3.16052	513	106.893	1059.5	796.059	5288.89	6700
*The default utgcns in generate consensus step of verkko2 uses `C 2`. We have used `C 0` to extend the assembly to telomeres where possible. The chosen run was run 5 because it has the most number of T2T chromosomes for wagyu.

## Sheet: S2_DeepVariant
Supplementary Table 2. The QV based on Merqury per chromosomes before and after polishing with DeepVariant.
Chromosome	before polishing	after polishing
1	64.1535	64.829
2	63.3994	63.6295
3	61.9414	62.18
4	62.9146	63.5935
5	60.5429	60.8769
6	62.3892	62.7248
7	59.1813	60.7172
8	61.759	61.9704
9	63.6927	64.2667
10	65.5764	65.8541
11	62.3733	62.6865
12	61.5613	61.5481
13	61.5594	60.527
14	60.562	60.7455
15	61.3644	61.7323
16	60.4343	60.556
17	61.0066	57.2232
18	56.9471	57.0842
19	57.7832	59.226
20	62.5876	62.9227
21	62.479	62.5468
22	60.7671	60.9147
23	59.5788	59.9081
24	52.2287	52.2737
25	59.4376	59.7216
26	59.2752	59.5148
27	62.2027	62.3914
28	62.7963	63.6506
29	60.7374	60.8926
X	59.5637	59.2933
chromosomes only		60.6184
whole genome (including unplaced)	54.3015	54.4331

## Sheet: S3_RepeatsGenome
Supplementary Table 3.1. The number and percentage of repeat families in UOA_Wagyu_1 and ARS-UCD2.0 (autosomes, X, Y, MT and unplaced)
	UOA_Wagyu_1		ARS-UCD2.0
	total repeats (bp)	percentage in the genome	total repeats (bp)	percentage in the genome
LINE	743902284	23.673	756101479	24.0612
Satellite	373701010	11.8922	55021042	1.75092
SINE	258952315	8.24057	260003465	8.27402
LTR	123379213	3.92626	121944610	3.88061
DNA	53830497	1.71303	53763750	1.71091
Simple_repeat	26789995	0.85253	24645193	0.784277
Low_complexity	4385625	0.139563	4260739	0.135588
rRNA	2018441	0.0642323	149822	0.00476774
Unknown	398493	0.0126811	474110	0.0150875
RC	246053	0.00783007	248156	0.007897
snRNA	214737	0.00683351	214179	0.00681576
tRNA	143980	0.00458183	141220	0.004494
srpRNA	10998	0.000349986	11885	0.000378213
scRNA	2435	7.74883e-05	2430	7.73292e-05
ARTEFACT	344	1.0947e-05	409	1.30155e-05
Supplementary Table 3.2. Repeats in the autosomes of the UOA_Wagyu_1 genome
Repeat class	UOA_Wagyu_1		ARS-UCD2.0
	Total length (bp)	Percentage in the genome	Total length (bp)	Percentage in the genome
LINE	675859442	23.649	670460201	23.4601
Satellite	296963105	10.391	5387859	0.188527
SINE	243447264	8.51848	241908853	8.46465
LTR	112217413	3.92661	110442192	3.86449
DNA	50406113	1.76376	50198003	1.75648
Simple_repeat	22491941	0.787017	21030802	0.73589
Low_complexity	3926986	0.137409	3883253	0.135879
Unknown	379742	0.0132876	377591	0.0132123
rRNA	370587	0.0129672	129275	0.00452347
RC	237119	0.00829705	238266	0.00833718
snRNA	203874	0.00713377	200703	0.00702281
tRNA	138482	0.00484563	133481	0.00467064
srpRNA	9907	0.000346656	10526	0.000368316
scRNA	2393	8.37336e-05	2388	8.35587e-05
ARTEFACT	259	9.06268e-06	293	1.02524e-05
Supplementary Table 3.3. Repeats in the unplaced region of the UOA_Wagyu_1 genome
Percentage of repeats in the unplaced region	76.4981
Satellite/centromeric	69.149
rDNA contigs	6.89603
Telomeres	0.299735
Others	0.153334

## Sheet: S4_rDNA
Supplementary Table 4.1. GFF file of the rDNA unit (35Kb)
seqid	source	type	start	end	score	strand	phase	attributes
rDNA	consensus	18S	1	1872	.	+	.	size: 1872, region identified using alignment with DQ222453.1 using blast
rDNA	consensus	ITS1	1873	3734	.	+	.	size: 1862, in between
rDNA	consensus	5.8S	3735	3890	.	+	.	size: 156, region identified using alignment with DQ222453.1 using blast
rDNA	consensus	ITS2	3891	5956	.	+	.	size: 2066, in between
rDNA	consensus	28S	5957	9918	.	+	.	size: 3962, region identified using alignment with DQ222453.1 using blast
rDNA	consensus	3ETS	9919	10250	.	+	.	size: 332, region identified using alignment with U13369.1 using mafft
rDNA	consensus	IGS	10251	31425	.	+	.	size: 21175, in between
rDNA	consensus	5ETS	31426	34697	.	+	.	size: 3272, region identified using alignment with U13369.1 using mafft
Supplementary Table 4.2. Percentage identity and complete copies of the rDNA parts
type	copies	number of chromosome/unplaced scaffolds	percentage identity	total alignment	mean alignment	mean cover alignment
18S	212	109	99.9745	396569	1870.61	0.999257
28S	207	105	99.9017	818624	3954.71	0.998159
3ETS	219	107	99.5674	72777	332.315	1.00095
5.8S	218	109	99.9471	33990	155.917	0.999471
5ETS	212	108	99.2506	694391	3275.43	1.00105
ITS1	211	107	99.5222	393273	1863.85	1.001
ITS2	210	106	99.4514	434634	2069.69	1.00178
rDNA_51bp	2989	107	98.6638	151421	50.6594	0.993322

## Sheet: S5_StatisticsChr
Supplementary Table 5. Assembly statistics of the UOA_Wagyu_1 per chromosomes. The description for each column is as follows:
Completion	status of the chromosome (T means with telomere, noT means no telomere). There are 8 scenarios where you can either have T (with telomere) or noT (no telomere) at p-arm, with gap or no gap, and T or noT at q-arm. T2T indicates complete chromosome (telomere-to-telomere). For example, noT_gap_T means there is no telomere at p-arm, there is gap within the sequence and there is telomere at q-arm.
Score	score is computed as 2 if T2T, 1 if it has only 1 telomere, and 0 if no telomere
Number of contig	number of contig aligning to that chromosome
Length	total scaffold size (bp)
Proportion to ARS-UCD2.0	percentage of the UOA_Wagyu_1 vs the reference (ARS-UCD2.0)
Gap count	number of gaps within the scaffolds
Total gap (bp)	size of gaps (N) in total (bp)
Centromere start	start coordinate of the centromeric region
Centromere end	end cooridnate of the centromeric region
Telomere arm	p if there's telomere in chromosome's short-arm, q if it's in chromosome's long-arm, pq if it's in both, or 0 if there is none. We consider presence of telomere based on VGP-pipeline standard.
Telomere p-arm qount	number of telomeric sequence (CCCTAA) in p-arm
Telomere q-arm count	number of telomeric sequence (TTAGGG) in q-arm
Telomere p-start	start coordinate of the p-arm telomeric region
Telomere p-end	end coordinate of the p-arm telomeric region
Telomere q-start	start coordinate of the q-arm telomeric region
Telomere q-end	end coordinate of the q-arm telomeric region
Assembly graph nodes	The name of the nodes that comprises the chromosome in the assembly graph
Chromosome	Completion	Score	Number of contig	Length	Proportion to ARS-UCD2.0	Gaps				Centromere		Telomere
						Gap count	Total gap (bp)	coordinates	Cause of gap	Start	End	Telomere arm	p-arm count	q-arm count	p-start	p-end	q-start	q-end	q-arm size	Assembly graph nodes
1	noT_nogap_T	1	1	178934809	112.868	0	0	-	-	1	22085767	q	0	3033	0	0	178915800	178934800	19000	utig4-271+,utig4-4178-,utig4-4180+,utig4-4378-,utig4-3989-,utig4-3987+,utig4-3710-,utig4-3708+,utig4-3470-,utig4-3467-,utig4-3469+,utig4-3770-,utig4-1924-,utig4-1920-,utig4-1922+,utig4-2339+,utig4-1885-,utig4-1884+,utig4-1887+,utig4-3738+,utig4-3739+,utig4-3865-,utig4-3866+,utig4-4335-,utig4-3323-,utig4-3322+,utig4-3019-,utig4-3017+,utig4-3020+,utig4-3741+,utig4-3742-,utig4-3443-,utig4-3441+,utig…
2	noT_nogap_noT	0	1	145309378	106.664	0	0	-	-	1	9717094	0	0	0	0	0	0	0	0	utig4-1746+,utig4-4443-,utig4-3847-,utig4-3843-,utig4-3845+,utig4-3877-,utig4-3878+,utig4-4033-,utig4-3909-,utig4-3906-,utig4-3907+,utig4-4484-,utig4-3429-,utig4-3425-,utig4-3427+,utig4-4533+,utig4-3946-,utig4-3945+,utig4-3949+,utig4-4080-,utig4-3794-,utig4-3793+,utig4-2602-,utig4-2599-,utig4-2601+,utig4-3373-,utig4-3374+,utig4-3438-,utig4-3440+,utig4-3727+,utig4-3729+,utig4-3838+,utig4-3840+,uti…
3	noT_gap_noT	0	1	140735462	116.305	1	4599	79952094-79956692	ambiguous node	1	19398602	0	0	0	0	0	0	0	0	utig4-3067+,utig4-4333-,utig4-3894-,utig4-3893-,utig4-2364-,utig4-2361-,utig4-2362+,utig4-3876+,utig4-3583-,utig4-3581+,utig4-3585+,utig4-3652-,utig4-3653+,utig4-3850-,utig4-3752-,utig4-3750+,utig4-3288-,utig4-3286-,utig4-2756-,utig4-2754+,utig4-2757+,utig4-3990-,[N4598N:ambig_bubble],utig4-2684-,utig4-2686+,utig4-3221+,utig4-3223+,utig4-3539+,utig4-3540+,utig4-4140-,utig4-4141+,utig4-4837-,utig4…
4	T_nogap_noT	1	1	136483041	113.735	0	0	-	-	9406	16562382	p	1188	0	0	8800	0	0	0	utig4-816+,utig4-4131+,utig4-4133+,utig4-4231+,utig4-3736-,utig4-3735-,utig4-3244-,utig4-3242+,utig4-3245+,utig4-4493+,utig4-2103-,utig4-2100-,utig4-2102+,utig4-4121-,utig4-3678-,utig4-3674-,utig4-3676+,utig4-4487+,utig4-3214-,utig4-3213-,utig4-2449-,utig4-2447+,utig4-2451+,utig4-4481+,utig4-3596-,utig4-3595+,utig4-3039-,utig4-3035-,utig4-3037+,utig4-4472-,utig4-3456-,utig4-3453-,utig4-3455+,utig…
5	noT_nogap_T	1	1	131231473	109.278	0	0	-	-	1	11639909	q	0	2919	0	0	131213400	131231400	18000	utig4-2872-,utig4-2873+,utig4-2876+,utig4-4369+,utig4-2836-,utig4-2835-,utig4-855-,utig4-851-,utig4-853+,utig4-3550+,utig4-3552+,utig4-4143+,utig4-3692-,utig4-3691+,utig4-3694+,utig4-3769+,utig4-2722-,utig4-2719-,utig4-2721+,utig4-3607+,utig4-3320-,utig4-3317-,utig4-3318+,utig4-3825-,utig4-3826+,utig4-4483+,utig4-1753-,utig4-1749-,utig4-1751+
6	noT_gap_noT	0	1	134310520	114.01	2	6002	21705076-21710076; 134208905-134209905	telomere-like repeat	1	16513417	0	0	0	0	0	0	0	0	utig4-2934+,utig4-3746-,utig4-3748+,utig4-3543-,utig4-2357-,utig4-2356+,[N5000N:ambig_path],utig4-4151+,utig4-1793-,utig4-1791+,utig4-3647-,utig4-3502-,utig4-3501+,utig4-3505+,utig4-3930+,utig4-3659-,utig4-3658+,utig4-3661+,utig4-3855-,utig4-3179-,utig4-3178+,utig4-3182+,utig4-4147-,utig4-4149+,utig4-4224+,utig4-2083-,utig4-2082+,utig4-2085+,utig4-3064+,utig4-3066+,utig4-3743+,utig4-3744+,utig4-4…
7	noT_gap_T	1	1	126431877	114.229	2	386222	8632800-9014020; 15335125-15340125	centromere; ambiguous path	1	15261645	q	0	3366	0	0	126410600	126431800	21200	utig4-2977-,[N381220N:tangle],utig4-2978+,[N5000N:ambig_path],utig4-2242+,utig4-2989+,utig4-2991+,utig4-3183+,utig4-3185+,utig4-3690-,utig4-3366-,utig4-3365+,utig4-3369+,utig4-3848-,utig4-3212-,utig4-3210+,utig4-2446-
8	noT_nogap_T	1	1	126230384	111.393	0	0	-	-	1	13917350	q	0	2177	0	0	126216800	126230400	13600	utig4-3497-,utig4-3495+,utig4-1601-,utig4-1598-,utig4-1600+,utig4-3520+,utig4-3522+,utig4-3880+,utig4-902-,utig4-899-,utig4-900+,utig4-4310-,utig4-4311+,utig4-4983-,utig4-3962-,utig4-3958-,utig4-3959+,utig4-4035-,utig4-3686-,utig4-3685+,utig4-3356-,utig4-3355+,utig4-2952-,utig4-2949-,utig4-2951+,utig4-2996+,utig4-2998+,utig4-3814+,utig4-3085-,utig4-3083-,utig4-1637-,utig4-1636+,utig4-1640+,utig4-…
9	T_2_T	2	1	127824907	121.213	0	0	-	-	16456	24228271	pq	1281	2838	0	8600	127807400	127824800	17400	utig4-326+,utig4-3916-,utig4-3638-,utig4-3637+,utig4-2183-,utig4-2179-,utig4-2180+,utig4-3566+,utig4-3568+,utig4-3920-,utig4-3196-,utig4-3194+,utig4-3197+,utig4-3821-,utig4-3823+,utig4-4515-,utig4-3578-,utig4-3577-,utig4-1433-,utig4-1431+,utig4-62-,utig4-60+,utig4-64+,utig4-3600-,utig4-3601+,utig4-4383-,utig4-3870-,utig4-3868+,utig4-3871+
10	T_2_T	2	1	116587619	112.854	0	0	-	-	11415	14562606	pq	1662	3213	0	10800	116567400	116587600	20200	utig4-2377+,utig4-4079-,utig4-3970-,utig4-3968-,utig4-3571-,utig4-3569+,utig4-1460-,utig4-1458+,utig4-3330+,utig4-3331+,utig4-3624-,utig4-3463-,utig4-3462+,utig4-3465+,utig4-3804+,utig4-3806+,utig4-4150+,utig4-3670-,utig4-3669+,utig4-3672+,utig4-4477+,utig4-4478+,utig4-4522+,utig4-3656-,utig4-3655+,utig4-1095-,utig4-1094+,utig4-3753-,utig4-2987-,utig4-2986-,utig4-933-,utig4-929-,utig4-930+,utig4-…
11	noT_gap_noT	0	1	114961712	107.459	1	311183	114500241-114811423	35S tandem repeat (rDNA)	1	8167731	0	0	0	0	0	0	0	0	utig4-971-,utig4-973+,utig4-977-,utig4-979+,utig4-3238-,utig4-3240+,utig4-3885-,utig4-3493-,utig4-3490-,utig4-3492+,utig4-3604+,utig4-3606+,utig4-3679+,utig4-3452-,utig4-3448-,utig4-3450+,utig4-3475-,utig4-3299-,utig4-3297+,utig4-3300+,utig4-3813-,utig4-3150-,utig4-3149+,utig4-3152+,utig4-3957-,utig4-3883-,utig4-3881+,utig4-3589-,utig4-3587-,utig4-3144-,utig4-3142+,utig4-50-,utig4-49+,utig4-52+,u…
12	noT_nogap_T	1	1	111200211	127.499	0	0	-	-	1	20377208	q	0	2051	0	0	111186800	111200200	13400	utig4-4135-,utig4-847-,utig4-844-,utig4-845+,utig4-4488-,utig4-3234-,utig4-3230-,utig4-3232+,utig4-4803-,utig4-4492-,utig4-4490-,utig4-1712-
13	noT_nogap_T	1	1	91989327	110.203	0	0	-	-	21	8126306	q	0	2861	0	0	91971800	91989200	17400	utig4-248-,utig4-244-,utig4-246+,utig4-3536+,utig4-3538+,utig4-4185-,utig4-2693-,utig4-2691+,utig4-2694+,utig4-3625+,utig4-3401-,utig4-3399+,utig4-3403+,utig4-4026-,utig4-3164-,utig4-3162-,utig4-2352-,utig4-2354+,utig4-3118+,utig4-3120+,utig4-3209-,utig4-2325-,utig4-2321-,utig4-2322+,utig4-3329-,utig4-2727-,utig4-2725+,utig4-2729+,utig4-4276-,utig4-3936-,utig4-3935-,utig4-3833-,utig4-3831+,utig4-…
14	noT_gap_T	1	1	90404212	109.71	1	1001	59326-60326	centromere	1	4240293	q	0	2384	0	0	90389400	90404200	14800	utig4-3404+,utig4-3719-,utig4-3721+,utig4-4091-,utig4-4093+,utig4-4497-,utig4-3352-,utig4-3350+,utig4-3353+,utig4-4338-,utig4-2092-,utig4-2091-,[N1000N:ambig_bubble],utig4-2088-,utig4-2087+
15	noT_nogap_T	1	1	92318909	108.6	0	0	-	-	1	8612204	q	0	3084	0	0	92299400	92318800	19400	utig4-3080-,utig4-4609+,utig4-3075-,utig4-3074+,utig4-3077+,utig4-3734-,utig4-3027-,utig4-3024-,utig4-3025+,utig4-3512-,utig4-3514+,utig4-3967-,utig4-3912-,utig4-3911-,utig4-3174-,utig4-3173+,utig4-3176+,utig4-3796+,utig4-2960-,utig4-2959+,utig4-2021-,utig4-2020+,utig4-2023+,utig4-3418-,utig4-3420+,utig4-4325+,utig4-3310-,utig4-3309-,utig4-3251-,utig4-3248-,utig4-3249+
16	noT_nogap_T	1	1	97203696	119.984	0	0	-	-	1	15466449	q	0	883	0	0	97198000	97203600	5600	utig4-316+,utig4-4066+,utig4-3500-,utig4-3498+,utig4-3262-,utig4-3261+,utig4-3264+,utig4-3902-,utig4-3890-,utig4-3886-,utig4-3888+,utig4-3892+,utig4-4270+,utig4-4271+,utig4-4510-,utig4-3853-,utig4-3851-,utig4-3611-,utig4-3608-,utig4-3610+,utig4-3903-,utig4-3904+
17	noT_nogap_T	1	1	87058178	118.985	0	0	-	-	910	14366716	q	0	1430	0	0	87049200	87058200	9000	utig4-466+,utig4-3807+,utig4-3764-,utig4-3760-,utig4-3761+,utig4-4334+,utig4-2853-,utig4-2850-,utig4-2851+,utig4-3854-,utig4-3295-,utig4-3292-,utig4-3293+,utig4-3680-,utig4-3630-,utig4-3626-,utig4-3627+,utig4-4134+,utig4-2032-,utig4-2028-,utig4-2030+,utig4-3554+,utig4-3416-,utig4-3415-,utig4-2635-,utig4-2634+,utig4-2579-
18	noT_nogap_T	1	1	74316014	112.907	0	0	-	-	2	8001209	q	0	3106	0	0	74297000	74316000	19000	utig4-3303+,utig4-3580+,utig4-3395-,utig4-3394-,utig4-357-,utig4-356+,utig4-360+,utig4-2576+,utig4-2577+,utig4-4337-,utig4-3768-,utig4-3765+
19	noT_gap_T	1	1	68471282	107.914	1	15243	62072341-62087583	100 Kbp tandem repeat (cpg island)	1	5773803	q	0	1632	0	0	68461000	68471200	10200	utig4-4584+,utig4-4588+,utig4-4851+,utig4-3829-,utig4-3828+,utig4-447-,utig4-444-,utig4-445+,utig4-1447-,utig4-1449+,utig4-3167+,utig4-2174-,utig4-2172+,utig4-2175+,utig4-3705-,[N15242N:ambig_bubble],utig4-4739-,utig4-3526-,utig4-3523-,utig4-3524+
20	noT_nogap_T	1	1	72148635	100.242	0	0	-	-	NA	NA	q	0	2179	0	0	72135000	72148600	13600	utig4-3379+,utig4-3931-,utig4-340-,utig4-337-,utig4-338+,utig4-4028-,utig4-3667-,utig4-3665-,utig4-3663+,utig4-274-,utig4-272+,utig4-275+,utig4-3345-,utig4-3346+,utig4-4025-,utig4-2069-,utig4-2066-,utig4-2068+,utig4-2827+,utig4-2828+,utig4-3856+,utig4-3857+,utig4-3884+,utig4-2142-,utig4-2140+,utig4-2143+,utig4-3266+,utig4-2389-
21	T_2_T	2	1	87138020	124.727	0	0	-	-	24089	16961745	pq	1637	1753	0	10600	87127000	87138000	11000	utig4-2326+,utig4-2900-,utig4-2901+,utig4-2903+,utig4-1632-,utig4-1629-,utig4-1631+,utig4-2478-,utig4-2479+,utig4-3972-,utig4-3971+,utig4-3575-,utig4-3574-,utig4-3281-,utig4-3280+,utig4-3283+,utig4-3704+,utig4-3617-,utig4-3613-,utig4-3615+,utig4-3928-,utig4-3313-,utig4-3312+,utig4-260-,utig4-258+,utig4-261+,utig4-3216-,utig4-3206-,utig4-3204+,utig4-3207+,utig4-3896-,utig4-3897+,utig4-4313+,utig4-…
22	noT_gap_T	1	1	73130920	120.335	1	5001	11842535-11847535	5S tandem repeat (rDNA)	6	11749366	q	0	1298	0	0	73122800	73130800	8000	utig4-377+,utig4-1183-,[N5000N:ambig_path],utig4-989+,utig4-3483-,utig4-3485+,utig4-3487-,utig4-3489+,utig4-4075-,utig4-3620-,utig4-3618+,utig4-3621+,utig4-3733-,utig4-2652-,utig4-2649-,utig4-2650+,utig4-3472-,utig4-3474+
23	T_2_T	2	1	68068986	129.659	0	0	-	-	16989	14245803	pq	2422	1614	0	16400	68058800	68068800	10000	utig4-3953+,utig4-3954+,utig4-4077+,utig4-3756-,utig4-3754+,utig4-3758+,utig4-3815-,utig4-3817+,utig4-3862+,utig4-3863+,utig4-4454+,utig4-1039-,utig4-1036-,utig4-1037+,utig4-3921-,utig4-3012-,utig4-3009-,utig4-3010+,utig4-4106+,utig4-1541-,utig4-1539+,utig4-1542+
24	noT_gap_T	1	1	72761981	116.761	1	150054	72499324-72649377	telomere-like repeat	1	10483946	q	0	981	0	0	72755600	72761800	6200	utig4-3918+,utig4-3919+,utig4-3820-,utig4-3818+,utig4-3643-,utig4-3641-,utig4-2546-,utig4-2547+,utig4-4083+,utig4-3000-,utig4-2999+,utig4-3003+,utig4-3722-,utig4-3056-,utig4-3052-,utig4-3054+,utig4-3434-,utig4-3435+,utig4-4168+,utig4-3072-,utig4-3069-,utig4-3071+,[N150053N:tangle],utig4-1013-
25	noT_nogap_noT	0	1	52210224	123.281	0	0	-	-	1	9665183	0	0	0	0	0	0	0	0	utig4-846+,utig4-3964+,utig4-3966+,utig4-4398-,utig4-2971-
26	T_gap_T	2	1	59327339	114.108	1	5001	3597607-3602607	centromere	8387	8345761	pq	1215	3363	0	7800	59306800	59327200	20400	utig4-904+,utig4-905+,utig4-909+,utig4-916+,utig4-4459-,[N5000N:ambig_path],utig4-2890+,utig4-4055-,utig4-4022-,utig4-4020-,utig4-3926-,utig4-3922-,utig4-3924+
27	noT_nogap_T	1	1	63262363	138.696	0	0	-	-	1	17704293	q	0	1499	0	0	63253000	63262400	9400	utig4-2383+,utig4-2662-,utig4-2663+,utig4-3623-,utig4-3592-,utig4-3590+,utig4-3593+,utig4-4804+,utig4-4805+
28	noT_gap_T	1	1	58389846	127.1	1	5001	15241675-15246675	5S tandem repeat (rDNA)	1	13288572	q	0	2347	0	0	58375400	58389800	14400	utig4-3684-,utig4-3681-,utig4-3682+,utig4-4045-,utig4-1450-,[N5000N:ambig_path],utig4-1021+,utig4-3146+,utig4-3148+,utig4-4473+,utig4-4050-,utig4-4049+,utig4-4053+,utig4-4269+
29	noT_nogap_T	1	1	59422688	116.29	0	0	-	-	1	8557949	q	0	1463	0	0	59413400	59422600	9200	utig4-2439-,utig4-2437+,utig4-4047-,utig4-3900-,utig4-3899+,utig4-42-,utig4-38-,utig4-39+,utig4-2456-,utig4-2457+,utig4-3944+,utig4-3335-,utig4-3333+,utig4-3336+,utig4-3358-,utig4-3359+,utig4-3915-,utig4-3362-,utig4-3361+,utig4-442-
X	T_2_T	2	1	173607011	124.889	0	0	-	-	38000000	50000000	pq	2219	1867	0	13800	173595200	173607000	11800	utig4-112+
Mean					116.397		88930.7						1660.57	2222.54		10971.4			13841.7
Sum							889307						11624	53341

## Sheet: S6_CENPA
Supplementary Table 6.1. CENP-A enrichment levels of the bovine satellite repeats called with SEACR within the centromeric region using the broad and max peak
Region	CENP-A broad peak (total signal)						CENP-A max peak
	Count	Total	Normalised				Count	Total	Normalised
			Mean	SD	Median	IQR			Mean	SD	Median	IQR
SATI	27144	390959874	12.8747	7.96237	10.9836	8.85448	113	3038	26.885	20.2038	22	17
SATII	9614	100049343	16.2489	14.1167	12.1841	14.8251	210	2811	13.3857	17.5937	7	10
SATIII	49809	3612798389	38.9147	20.7945	35.5884	20.1647	107	10626	99.3084	60.7546	100	68.5
SATIV	191	20372674	32.9506	17.0111	29.5991	26.5742	-	-	-	-	-	-
SATV	2562	77987800	32.7104	19.7558	27.8025	19.5097	4	228	57	40.538	57	47.5
SATVI	389	4482336	12.2127	10.0124	8.95997	11.1015	-	-	-	-	-	-
SATVII	146	496110	38.4517	11.2915	41.406	17.5589	1	6	6	NA	6	0
X_centromere	373	2107762	13.5579	15.3296	6.4781	17.0856	225	4809	21.3733	21.3747	14	21
Supplementary Table 6.2. Pairwise comparisons using Wilcoxon rank sum test of the CENP-A enrichment levels on different satellite repeats called with SEACR within the centromeric region using the broad level
	SATI	SATII	SATIII	SATIV	SATV	SATVI	SATVII
SATII	< 2e-16	-	-	-	-	-	-
SATIII	< 2e-16	< 2e-16	-	-	-	-	-
SATIV	< 2e-16	< 2e-16	2.8e-06	-	-	-	-
SATV	< 2e-16	< 2e-16	< 2e-16	0.42825	-	-	-
SATVI	2.5e-06	3.5e-09	< 2e-16	< 2e-16	< 2e-16	-	-
SATVII	< 2e-16	< 2e-16	0.05463	6.8e-05	1.8e-13	< 2e-16	-
X_centromere	1.1e-13	5e-16	< 2e-16	< 2e-16	< 2e-16	0.00061	< 2e-16
Supplementary Table 6.3. Pairwise comparisons using Wilcoxon rank sum test of the CENP-A enrichment levels on different satellite repeats called with SEACR within the centromeric region using the max peak
	SATI	SATII	SATIII	SATV	SATVII
SATII	< 2e-16	-	-	-	-
SATIII	< 2e-16	< 2e-16	-	-	-
SATV	0.15055	0.01775	0.15846	-	-
SATVII	0.15055	0.8952	0.15055	0.42857	-
X_ctr	0.00024	1.8e-09	< 2e-16	0.08452	0.40317
Note: Normalised CENP-A level is computed by dividing the alignment length by cenpa level. Hence, normalised CENP-A level is presumed to be by base pair.
cenpa broad							1
Kruskal-Wallis chi-squared = 44561, df = 7, p-value < 2.2e-16							3
cenpa_max							1
Kruskal-Wallis chi-squared = 256.21, df = 5, p-value < 2.2e-16							3

## Sheet: S7_AutoCtrSats
Supplementary Table 7. Summary of bovine satellite repeats for number of copies, total length and quantitative statistics for each autosomes
Satellite groups were divided based on their sequence identity:
SATI - GroupA (≥95%), GroupB (<95% & >90%), GroupC (≤90%)
SATII - GroupA (≥95%), GroupB (<95)
SATVI - GroupA (≥98%), GroupB (<98%)
	within the centromeric region										throughout UOA_Wagyu_1 genome
					Sequence identity								Sequence identity
Chromosome	Satellite type	Satellite_group	Copies	Total length	Mean	Min	Max	SD	Median	IQR	Copies	Total length	Mean	Min	Max	SD	Median	IQR
1	SATI	GroupA	8554	11992656	0.957	0.955	0.961	0.0034641	0.955	0.003	8554	11992656	0.957	0.955	0.961	0.0034641	0.955	0.003
1	SATI	GroupC	NA	NA	NA	NA	NA	NA	NA	NA	42	57791	0.691	0.679	0.708	0.00886002	0.69	0.012
1	SATII	GroupA	406	276034	0.984	0.984	0.984	NA	0.984	0	406	276034	0.984	0.984	0.984	NA	0.984	0
1	SATII	GroupB	4	2463	0.66375	0.656	0.668	0.00567891	0.6655	0.00675	4	2463	0.66375	0.656	0.668	0.00567891	0.6655	0.00675
1	SATIII	-	2730	6521297	0.803488	0.686	0.844	0.0249891	0.803	0.023	2730	6521297	0.803488	0.686	0.844	0.0249891	0.803	0.023
1	SATIV	-	50	173217	0.987	0.972	0.989	0.00235606	0.987	0.001	50	173217	0.987	0.972	0.989	0.00235606	0.987	0.001
1	SATV	-	375	572327	0.957632	0.891	0.984	0.0162812	0.961	0.01775	375	572327	0.957632	0.891	0.984	0.0162812	0.961	0.01775
1	SATVI	GroupB	NA	NA	NA	NA	NA	NA	NA	NA	44	49176	0.941841	0.923	0.969	0.0132172	0.9375	0.02125
2	SATI	GroupA	1154	1618418	0.956	0.956	0.956	NA	0.956	0	1154	1618418	0.956	0.956	0.956	NA	0.956	0
2	SATI	GroupC	93	131810	0.770538	0.72	0.839	0.0422248	0.762	0.069	93	131810	0.770538	0.72	0.839	0.0422248	0.762	0.069
2	SATIII	-	1107	2644537	0.78125	0.777	0.787	0.005058	0.7805	0.00775	1107	2644537	0.78125	0.777	0.787	0.005058	0.7805	0.00775
2	SATIV	-	13	42736	0.984	0.983	0.985	0.000707107	0.984	0	13	42736	0.984	0.983	0.985	0.000707107	0.984	0
2	SATV	-	70	98150	0.712229	0.705	0.718	0.00221439	0.712	0.003	70	98150	0.712229	0.705	0.718	0.00221439	0.712	0.003
2	SATVI	GroupB	NA	NA	NA	NA	NA	NA	NA	NA	23	25239	0.939739	0.917	0.971	0.0151003	0.938	0.017
3	SATI	GroupA	5141	7207492	0.951	0.951	0.951	NA	0.951	0	5141	7207492	0.951	0.951	0.951	NA	0.951	0
3	SATI	GroupB	164	230148	0.915	0.905	0.922	0.00888819	0.918	0.0085	164	230148	0.915	0.905	0.922	0.00888819	0.918	0.0085
3	SATI	GroupC	22	30066	0.693	0.691	0.697	0.0034641	0.691	0.003	44	58028	0.687214	0.673	0.711	0.0101389	0.6865	0.011
3	SATII	GroupA	181	123255	0.985	0.985	0.985	NA	0.985	0	181	123255	0.985	0.985	0.985	NA	0.985	0
3	SATII	GroupB	4	2456	0.6675	0.658	0.678	0.00998332	0.667	0.0155	4	2456	0.6675	0.658	0.678	0.00998332	0.667	0.0155
3	SATIII	-	3467	8278781	0.795526	0.686	0.833	0.0310937	0.793	0.0255	3467	8278781	0.795526	0.686	0.833	0.0310937	0.793	0.0255
3	SATIV	-	54	177670	0.988389	0.983	0.995	0.00301203	0.988	0.002	54	177670	0.988389	0.983	0.995	0.00301203	0.988	0.002
3	SATV	-	347	504292	0.958911	0.893	0.984	0.0159309	0.962	0.02	347	504292	0.958911	0.893	0.984	0.0159309	0.962	0.02
3	SATVI	GroupB	NA	NA	NA	NA	NA	NA	NA	NA	24	26619	0.934542	0.901	0.972	0.0151915	0.934	0.0165
4	SATI	GroupA	5285	7409905	0.958	0.958	0.958	NA	0.958	0	5285	7409905	0.958	0.958	0.958	NA	0.958	0
4	SATI	GroupB	714	1005745	0.926614	0.908	0.935	0.00297917	0.927	0.003	714	1005745	0.926614	0.908	0.935	0.00297917	0.927	0.003
4	SATI	GroupC	94	131398	0.7302	0.645	0.899	0.0878133	0.667	0.146	94	131398	0.7302	0.645	0.899	0.0878133	0.667	0.146
4	SATII	GroupA	1112	755844	0.984	0.984	0.984	NA	0.984	0	1112	755844	0.984	0.984	0.984	NA	0.984	0
4	SATII	GroupB	9	5539	0.676556	0.656	0.743	0.0277178	0.672	0.02	9	5539	0.676556	0.656	0.743	0.0277178	0.672	0.02
4	SATIII	-	1087	2591403	0.793286	0.747	0.827	0.0254671	0.79	0.0215	1087	2591403	0.793286	0.747	0.827	0.0254671	0.79	0.0215
4	SATIV	-	295	984029	0.984058	0.972	0.989	0.00212374	0.984	0.003	295	984029	0.984058	0.972	0.989	0.00212374	0.984	0.003
4	SATV	-	131	181254	0.75422	0.698	0.981	0.0977769	0.709	0	131	181254	0.75422	0.698	0.981	0.0977769	0.709	0
4	SATVI	GroupA	602	693817	0.992537	0.984	0.997	0.00182864	0.993	0.002	602	693817	0.992537	0.984	0.997	0.00182864	0.993	0.002
4	SATVI	GroupB	NA	NA	NA	NA	NA	NA	NA	NA	24	26363	0.938792	0.918	0.965	0.0119673	0.9385	0.01625
4	SATVII	-	20	1864	0.920333	0.905	0.946	0.0223681	0.91	0.0205	20	1864	0.920333	0.905	0.946	0.0223681	0.91	0.0205
5	SATI	GroupA	3073	4308545	0.955	0.955	0.955	NA	0.955	0	3073	4308545	0.955	0.955	0.955	NA	0.955	0
5	SATI	GroupC	36	52052	0.678522	0.655	0.713	0.014712	0.681	0.019	36	52052	0.678522	0.655	0.713	0.014712	0.681	0.019
5	SATII	GroupA	409	277961	0.983	0.983	0.983	NA	0.983	0	409	277961	0.983	0.983	0.983	NA	0.983	0
5	SATII	GroupB	4	2463	0.66475	0.657	0.669	0.00543906	0.6665	0.00525	4	2463	0.66475	0.657	0.669	0.00543906	0.6665	0.00525
5	SATIII	-	2201	5272991	0.785932	0.77	0.834	0.0157391	0.781	0.016	2201	5272991	0.785932	0.77	0.834	0.0157391	0.781	0.016
5	SATIV	-	21	69293	0.985857	0.984	0.988	0.00142428	0.986	0.002	21	69293	0.985857	0.984	0.988	0.00142428	0.986	0.002
5	SATV	-	344	508384	0.943985	0.836	0.99	0.0293744	0.947	0.0405	344	508384	0.943985	0.836	0.99	0.0293744	0.947	0.0405
5	SATVI	GroupB	NA	NA	NA	NA	NA	NA	NA	NA	20	22501	0.94045	0.918	0.967	0.0136477	0.941	0.0175
6	SATI	GroupA	1827	2561585	0.959667	0.955	0.962	0.00404145	0.962	0.0035	1827	2561585	0.959667	0.955	0.962	0.00404145	0.962	0.0035
6	SATI	GroupB	446	624125	0.928667	0.925	0.935	0.00550757	0.926	0.005	446	624125	0.928667	0.925	0.935	0.00550757	0.926	0.005
6	SATI	GroupC	442	620010	0.877	0.877	0.877	NA	0.877	0	444	623235	0.7805	0.684	0.877	0.136472	0.7805	0.0965
6	SATII	GroupA	74	50334	0.969	0.969	0.969	NA	0.969	0	74	50334	0.969	0.969	0.969	NA	0.969	0
6	SATII	GroupB	4	2463	0.664	0.656	0.669	0.00594418	0.6655	0.007	5	3068	0.699	0.656	0.839	0.0784315	0.668	0.006
6	SATIII	-	3399	8107993	0.801935	0.656	0.844	0.0527832	0.819	0.0355	3399	8107993	0.801935	0.656	0.844	0.0527832	0.819	0.0355
6	SATIV	-	11	37535	0.986727	0.986	0.988	0.00064667	0.987	0.001	11	37535	0.986727	0.986	0.988	0.00064667	0.987	0.001
6	SATV	-	600	936901	0.960259	0.911	0.983	0.0138276	0.961	0.015	600	936901	0.960259	0.911	0.983	0.0138276	0.961	0.015
6	SATVI	GroupB	NA	NA	NA	NA	NA	NA	NA	NA	28	30872	0.938036	0.918	0.963	0.0132846	0.935	0.013
7	SATI	GroupA	2961	4151874	0.957	0.955	0.959	0.00282843	0.957	0.002	2961	4151874	0.957	0.955	0.959	0.00282843	0.957	0.002
7	SATI	GroupB	679	951045	0.928	0.926	0.932	0.0034641	0.926	0.003	679	951045	0.928	0.926	0.932	0.0034641	0.926	0.003
7	SATII	GroupA	85	57560	0.972	0.972	0.972	NA	0.972	0	85	57560	0.972	0.972	0.972	NA	0.972	0
7	SATII	GroupB	4	2463	0.6645	0.656	0.669	0.00591608	0.6665	0.0055	4	2463	0.6645	0.656	0.669	0.00591608	0.6665	0.0055
7	SATIII	-	2860	6827280	0.784077	0.656	0.842	0.0449059	0.7905	0.024	2860	6827280	0.784077	0.656	0.842	0.0449059	0.7905	0.024
7	SATIV	-	11	37537	0.986273	0.984	0.987	0.000904534	0.986	0.001	11	37537	0.986273	0.984	0.987	0.000904534	0.986	0.001
7	SATV	-	367	529349	0.961223	0.861	0.985	0.0223497	0.969	0.022	367	529349	0.961223	0.861	0.985	0.0223497	0.969	0.022
7	SATVI	GroupB	NA	NA	NA	NA	NA	NA	NA	NA	27	29783	0.937741	0.914	0.974	0.0130755	0.934	0.011
8	SATI	GroupA	2444	3426311	0.957	0.957	0.957	NA	0.957	0	2444	3426311	0.957	0.957	0.957	NA	0.957	0
8	SATII	GroupA	803	545995	0.985	0.985	0.985	NA	0.985	0	803	545995	0.985	0.985	0.985	NA	0.985	0
8	SATII	GroupB	4	2463	0.66375	0.656	0.668	0.00567891	0.6655	0.00675	4	2463	0.66375	0.656	0.668	0.00567891	0.6655	0.00675
8	SATIII	-	1995	4759285	0.806429	0.776	0.83	0.0156255	0.805	0.024	1995	4759285	0.806429	0.776	0.83	0.0156255	0.805	0.024
8	SATIV	-	145	477869	0.986262	0.983	0.988	0.00119036	0.987	0.001	145	477869	0.986262	0.983	0.988	0.00119036	0.987	0.001
8	SATV	-	882	1231371	0.971326	0.897	0.989	0.0196538	0.98	0.026	882	1231371	0.971326	0.897	0.989	0.0196538	0.98	0.026
8	SATVI	GroupB	NA	NA	NA	NA	NA	NA	NA	NA	17	18954	0.941882	0.926	0.975	0.0168704	0.934	0.031
9	SATI	GroupA	8601	12057035	0.960333	0.956	0.968	0.00466369	0.958	0.008	8601	12057035	0.960333	0.956	0.968	0.00466369	0.958	0.008
9	SATI	GroupB	390	547635	0.916917	0.903	0.942	0.00914985	0.9165	0.00625	390	547635	0.916917	0.903	0.942	0.00914985	0.9165	0.00625
9	SATI	GroupC	197	276371	0.8713	0.776	0.891	0.0377802	0.8885	0.0065	205	287076	0.825385	0.652	0.891	0.0935428	0.887	0.113
9	SATII	GroupA	1565	1064227	0.9835	0.983	0.984	0.000707107	0.9835	0.0005	1565	1064227	0.9835	0.983	0.984	0.000707107	0.9835	0.0005
9	SATII	GroupB	9	5539	0.678	0.656	0.746	0.0286749	0.674	0.02	9	5539	0.678	0.656	0.746	0.0286749	0.674	0.02
9	SATIII	-	2906	6936873	0.80068	0.766	0.829	0.0176203	0.799	0.024	2906	6936873	0.80068	0.766	0.829	0.0176203	0.799	0.024
9	SATIV	-	1	3275	0.984	0.984	0.984	NA	0.984	0	1	3275	0.984	0.984	0.984	NA	0.984	0
9	SATV	-	352	488075	0.958085	0.882	0.986	0.0190838	0.961	0.0205	352	488075	0.958085	0.882	0.986	0.0190838	0.961	0.0205
9	SATVI	GroupB	1	1117	0.945	0.945	0.945	NA	0.945	0	27	30287	0.946593	0.923	0.968	0.0138015	0.944	0.0255
9	SATVII	-	18	1679	0.926	0.906	0.946	0.0282843	0.926	0.02	18	1679	0.926	0.906	0.946	0.0282843	0.926	0.02
10	SATI	GroupA	4556	6387546	0.958	0.958	0.958	NA	0.958	0	4556	6387546	0.958	0.958	0.958	NA	0.958	0
10	SATI	GroupC	83	114749	0.703429	0.667	0.748	0.030464	0.697	0.061	83	114749	0.703429	0.667	0.748	0.030464	0.697	0.061
10	SATII	GroupA	1268	862438	0.984	0.984	0.984	NA	0.984	0	1268	862438	0.984	0.984	0.984	NA	0.984	0
10	SATII	GroupB	9	5542	0.676111	0.656	0.746	0.0284844	0.667	0.012	10	6229	0.6884	0.656	0.799	0.0472375	0.668	0.02625
10	SATIII	-	2347	5602914	0.81055	0.748	0.837	0.0204102	0.8125	0.02425	2347	5602914	0.81055	0.748	0.837	0.0204102	0.8125	0.02425
10	SATIV	-	6	20151	0.988	0.987	0.99	0.00126491	0.9875	0.00175	6	20151	0.988	0.987	0.99	0.00126491	0.9875	0.00175
10	SATV	-	96	126473	0.951776	0.896	0.982	0.0238719	0.96	0.034	96	126473	0.951776	0.896	0.982	0.0238719	0.96	0.034
10	SATVI	GroupB	NA	NA	NA	NA	NA	NA	NA	NA	35	39045	0.939743	0.921	0.964	0.011536	0.938	0.016
10	SATVII	-	20	1863	0.920333	0.906	0.946	0.0222785	0.909	0.02	20	1863	0.920333	0.906	0.946	0.0222785	0.909	0.02
11	SATI	GroupA	1451	2034864	0.963	0.963	0.963	NA	0.963	0	1451	2034864	0.963	0.963	0.963	NA	0.963	0
11	SATI	GroupB	5	7442	0.909	0.909	0.909	NA	0.909	0	5	7442	0.909	0.909	0.909	NA	0.909	0
11	SATIII	-	1840	4392594	0.797059	0.771	0.83	0.0183285	0.792	0.02	1840	4392594	0.797059	0.771	0.83	0.0183285	0.792	0.02
11	SATV	-	189	273013	0.946113	0.901	0.979	0.0203171	0.949	0.025	189	273013	0.946113	0.901	0.979	0.0203171	0.949	0.025
11	SATVI	GroupB	NA	NA	NA	NA	NA	NA	NA	NA	13	14272	0.933769	0.906	0.967	0.0171423	0.931	0.01
12	SATI	GroupA	3385	4746212	0.955	0.955	0.955	NA	0.955	0	3385	4746212	0.955	0.955	0.955	NA	0.955	0
12	SATI	GroupB	1245	1750999	0.925504	0.912	0.949	0.00325948	0.925	0.003	1245	1750999	0.925504	0.912	0.949	0.00325948	0.925	0.003
12	SATI	GroupC	30	42609	0.7499	0.727	0.889	0.0490837	0.7365	0.006	34	47638	0.739667	0.686	0.889	0.0504333	0.735	0.01125
12	SATII	GroupA	18	12250	0.98	0.98	0.98	NA	0.98	0	18	12250	0.98	0.98	0.98	NA	0.98	0
12	SATII	GroupB	4	2459	0.66825	0.658	0.678	0.0107199	0.6685	0.01775	4	2459	0.66825	0.658	0.678	0.0107199	0.6685	0.01775
12	SATIII	-	2770	6611409	0.821818	0.757	0.871	0.0294655	0.821	0.039	2770	6611409	0.821818	0.757	0.871	0.0294655	0.821	0.039
12	SATIV	-	706	2399199	0.985724	0.971	0.993	0.00291398	0.986	0.004	706	2399199	0.985724	0.971	0.993	0.00291398	0.986	0.004
12	SATV	-	179	237696	0.962556	0.921	0.981	0.0157301	0.968	0.017	179	237696	0.962556	0.921	0.981	0.0157301	0.968	0.017
12	SATVI	GroupA	636	730858	0.993494	0.986	0.997	0.00178399	0.994	0.003	636	730858	0.993494	0.986	0.997	0.00178399	0.994	0.003
12	SATVI	GroupB	NA	NA	NA	NA	NA	NA	NA	NA	17	18525	0.934353	0.92	0.967	0.0140577	0.927	0.016
12	SATVII	-	NA	NA	NA	NA	NA	NA	NA	NA	6	546	0.9285	0.924	0.933	0.00636396	0.9285	0.0045
13	SATI	GroupA	2401	3365770	0.976	0.976	0.976	NA	0.976	0	2401	3365770	0.976	0.976	0.976	NA	0.976	0
13	SATIII	-	1206	2879124	0.7955	0.758	0.831	0.0232271	0.7955	0.006	1206	2879124	0.7955	0.758	0.831	0.0232271	0.7955	0.006
13	SATV	-	373	513556	0.944063	0.864	0.982	0.0231562	0.947	0.025	373	513556	0.944063	0.864	0.982	0.0231562	0.947	0.025
13	SATVI	GroupB	NA	NA	NA	NA	NA	NA	NA	NA	11	12082	0.933455	0.918	0.961	0.0141447	0.925	0.0185
14	SATI	GroupA	2477	3472937	0.954	0.953	0.955	0.00141421	0.954	0.001	2477	3472937	0.954	0.953	0.955	0.00141421	0.954	0.001
14	SATI	GroupB	NA	NA	NA	NA	NA	NA	NA	NA	1	1170	0.913	0.913	0.913	NA	0.913	0
14	SATIII	-	105	250742	0.783	0.783	0.783	NA	0.783	0	105	250742	0.783	0.783	0.783	NA	0.783	0
14	SATV	-	2	3124	0.909	0.886	0.932	0.0325269	0.909	0.023	2	3124	0.909	0.886	0.932	0.0325269	0.909	0.023
14	SATVI	GroupB	NA	NA	NA	NA	NA	NA	NA	NA	19	21019	0.941737	0.924	0.966	0.0120869	0.941	0.0145
15	SATI	GroupA	2472	3464664	0.956833	0.95	0.963	0.00416733	0.957	0.0015	2472	3464664	0.956833	0.95	0.963	0.00416733	0.957	0.0015
15	SATI	GroupC	29	40375	0.749	0.727	0.788	0.0218906	0.7475	0.01825	32	45374	0.723375	0.646	0.788	0.0509283	0.7385	0.0425
15	SATIII	-	1584	3779939	0.791933	0.666	0.834	0.0467172	0.809	0.024	1584	3779939	0.791933	0.666	0.834	0.0467172	0.809	0.024
15	SATV	-	168	228292	0.949301	0.878	0.98	0.0242863	0.955	0.036	168	228292	0.949301	0.878	0.98	0.0242863	0.955	0.036
15	SATVI	GroupB	NA	NA	NA	NA	NA	NA	NA	NA	22	24310	0.943909	0.926	0.969	0.0158262	0.936	0.0275
16	SATI	GroupA	877	1229725	0.958	0.958	0.958	NA	0.958	0	877	1229725	0.958	0.958	0.958	NA	0.958	0
16	SATI	GroupB	1505	2115883	0.92699	0.913	0.947	0.00383827	0.926	0.004	1505	2115883	0.92699	0.913	0.947	0.00383827	0.926	0.004
16	SATI	GroupC	131	185392	0.731714	0.687	0.791	0.0210235	0.73	0.0195	133	188245	0.7264	0.65	0.791	0.0286496	0.729	0.0215
16	SATII	GroupB	NA	NA	NA	NA	NA	NA	NA	NA	3	1717	0.844667	0.843	0.847	0.00208167	0.844	0.002
16	SATIII	-	2596	6194186	0.78445	0.665	0.825	0.0421245	0.7955	0.01625	2596	6194186	0.78445	0.665	0.825	0.0421245	0.7955	0.01625
16	SATIV	-	215	729388	0.985093	0.971	0.989	0.00273057	0.985	0.003	215	729388	0.985093	0.971	0.989	0.00273057	0.985	0.003
16	SATV	-	152	231429	0.958611	0.894	0.981	0.0183755	0.966	0.029	152	231429	0.958611	0.894	0.981	0.0183755	0.966	0.029
16	SATVI	GroupA	720	829043	0.993474	0.985	0.997	0.00221811	0.994	0.003	720	829043	0.993474	0.985	0.997	0.00221811	0.994	0.003
16	SATVI	GroupB	2	2169	0.909	0.9	0.918	0.0127279	0.909	0.009	11	12134	0.937273	0.9	0.966	0.0187888	0.94	0.021
17	SATI	GroupA	3589	5032087	0.956	0.954	0.958	0.00282843	0.956	0.002	3589	5032087	0.956	0.954	0.958	0.00282843	0.956	0.002
17	SATI	GroupB	568	796987	0.946	0.946	0.946	NA	0.946	0	568	796987	0.946	0.946	0.946	NA	0.946	0
17	SATII	GroupA	1135	772124	0.984	0.984	0.984	NA	0.984	0	1135	772124	0.984	0.984	0.984	NA	0.984	0
17	SATII	GroupB	149	100682	0.690143	0.656	0.903	0.0654356	0.67	0.0205	149	100682	0.690143	0.656	0.903	0.0654356	0.67	0.0205
17	SATIII	-	1840	4391341	0.798538	0.777	0.827	0.0153873	0.798	0.015	1840	4391341	0.798538	0.777	0.827	0.0153873	0.798	0.015
17	SATIV	-	39	129819	0.981821	0.979	0.986	0.0017301	0.982	0.002	39	129819	0.981821	0.979	0.986	0.0017301	0.982	0.002
17	SATV	-	94	139358	0.961269	0.876	0.979	0.0131009	0.962	0.011	94	139358	0.961269	0.876	0.979	0.0131009	0.962	0.011
17	SATVI	GroupB	NA	NA	NA	NA	NA	NA	NA	NA	9	10059	0.929111	0.914	0.955	0.0129078	0.93	0.018
17	SATVII	-	16	1475	0.917	0.9	0.941	0.0213776	0.91	0.0205	16	1475	0.917	0.9	0.941	0.0213776	0.91	0.0205
18	SATI	GroupA	3621	5076703	0.962	0.962	0.962	NA	0.962	0	3621	5076703	0.962	0.962	0.962	NA	0.962	0
18	SATI	GroupC	23	30209	0.674154	0.652	0.694	0.0126217	0.677	0.014	23	30209	0.674154	0.652	0.694	0.0126217	0.677	0.014
18	SATII	GroupB	6	3682	0.704167	0.695	0.721	0.0102648	0.7005	0.01275	6	3682	0.704167	0.695	0.721	0.0102648	0.7005	0.01275
18	SATIII	-	687	1637497	0.7789	0.665	0.815	0.0437072	0.7895	0.03325	687	1637497	0.7789	0.665	0.815	0.0437072	0.7895	0.03325
18	SATIV	-	35	114951	0.983457	0.982	0.986	0.000950011	0.983	0.001	35	114951	0.983457	0.982	0.986	0.000950011	0.983	0.001
18	SATV	-	72	99304	0.950037	0.862	0.977	0.0293187	0.968	0.0395	72	99304	0.950037	0.862	0.977	0.0293187	0.968	0.0395
18	SATVI	GroupB	NA	NA	NA	NA	NA	NA	NA	NA	17	18279	0.935882	0.91	0.968	0.0136193	0.937	0.013
19	SATI	GroupA	3590	5033845	0.967	0.967	0.967	NA	0.967	0	3590	5033845	0.967	0.967	0.967	NA	0.967	0
19	SATI	GroupC	17	23013	0.653	0.634	0.665	0.00883176	0.654	0.007	17	23013	0.653	0.634	0.665	0.00883176	0.654	0.007
19	SATVI	GroupA	NA	NA	NA	NA	NA	NA	NA	NA	1	1174	0.98	0.98	0.98	NA	0.98	0
19	SATVI	GroupB	NA	NA	NA	NA	NA	NA	NA	NA	11	12032	0.934091	0.918	0.953	0.00983315	0.933	0.0095
20	SATVI	GroupB	NA	NA	NA	NA	NA	NA	NA	NA	19	21491	0.945947	0.917	0.97	0.0146419	0.948	0.021
21	SATI	GroupA	4823	6761858	0.955	0.955	0.955	NA	0.955	0	4823	6761858	0.955	0.955	0.955	NA	0.955	0
21	SATI	GroupC	23	32747	0.6996	0.687	0.706	0.00814248	0.703	0.01	30	42127	0.696143	0.686	0.706	0.00893362	0.696	0.0165
21	SATII	GroupA	394	268140	0.984	0.984	0.984	NA	0.984	0	394	268140	0.984	0.984	0.984	NA	0.984	0
21	SATII	GroupB	9	5543	0.676667	0.656	0.746	0.0284473	0.668	0.016	9	5543	0.676667	0.656	0.746	0.0284473	0.668	0.016
21	SATIII	-	3057	7296926	0.7998	0.733	0.836	0.0230612	0.8025	0.02275	3057	7296926	0.7998	0.733	0.836	0.0230612	0.8025	0.02275
21	SATIV	-	9	29987	0.988778	0.988	0.989	0.000440959	0.989	0	9	29987	0.988778	0.988	0.989	0.000440959	0.989	0
21	SATV	-	192	271907	0.962185	0.883	0.991	0.0178502	0.964	0.012	192	271907	0.962185	0.883	0.991	0.0178502	0.964	0.012
21	SATVI	GroupB	2	2072	0.9365	0.935	0.938	0.00212132	0.9365	0.0015	15	16423	0.9338	0.917	0.95	0.00961546	0.934	0.0115
21	SATVII	-	18	1630	0.913667	0.903	0.925	0.0110151	0.913	0.011	18	1630	0.913667	0.903	0.925	0.0110151	0.913	0.011
22	SATI	GroupA	2263	3171801	0.957	0.956	0.958	0.00141421	0.957	0.001	2263	3171801	0.957	0.956	0.958	0.00141421	0.957	0.001
22	SATII	GroupA	1683	1144522	0.986	0.986	0.986	NA	0.986	0	1683	1144522	0.986	0.986	0.986	NA	0.986	0
22	SATII	GroupB	4	2462	0.6635	0.656	0.669	0.00556776	0.6645	0.0055	4	2462	0.6635	0.656	0.669	0.00556776	0.6645	0.0055
22	SATIII	-	2057	4909155	0.784706	0.657	0.822	0.0361538	0.792	0.023	2057	4909155	0.784706	0.657	0.822	0.0361538	0.792	0.023
22	SATIV	-	13	43303	0.984615	0.984	0.985	0.00050637	0.985	0.001	13	43303	0.984615	0.984	0.985	0.00050637	0.985	0.001
22	SATV	-	211	296440	0.961381	0.923	0.987	0.0181067	0.968	0.02275	211	296440	0.961381	0.923	0.987	0.0181067	0.968	0.02275
22	SATVI	GroupB	NA	NA	NA	NA	NA	NA	NA	NA	7	7748	0.938286	0.92	0.958	0.0164693	0.94	0.029
22	SATVII	-	NA	NA	NA	NA	NA	NA	NA	NA	1	77	0.776	0.776	0.776	NA	0.776	0
23	SATI	GroupA	4454	6245031	0.958	0.958	0.958	NA	0.958	0	4454	6245031	0.958	0.958	0.958	NA	0.958	0
23	SATI	GroupB	2063	2902180	0.926418	0.914	0.946	0.003776	0.926	0.004	2063	2902180	0.926418	0.914	0.946	0.003776	0.926	0.004
23	SATI	GroupC	36	49352	0.786	0.734	0.862	0.0398452	0.792	0.06175	36	49352	0.786	0.734	0.862	0.0398452	0.792	0.06175
23	SATII	GroupA	696	473072	0.984	0.984	0.984	NA	0.984	0	696	473072	0.984	0.984	0.984	NA	0.984	0
23	SATII	GroupB	9	5539	0.676778	0.656	0.743	0.0277389	0.672	0.022	9	5539	0.676778	0.656	0.743	0.0277389	0.672	0.022
23	SATIII	-	51	123019	0.70525	0.687	0.712	0.0121758	0.711	0.00625	51	123019	0.70525	0.687	0.712	0.0121758	0.711	0.00625
23	SATIV	-	662	2245603	0.987173	0.972	0.995	0.00297638	0.988	0.003	662	2245603	0.987173	0.972	0.995	0.00297638	0.988	0.003
23	SATV	-	1	1134	0.769	0.769	0.769	NA	0.769	0	1	1134	0.769	0.769	0.769	NA	0.769	0
23	SATVI	GroupA	1223	1410140	0.993624	0.984	0.997	0.00217578	0.994	0.002	1223	1410140	0.993624	0.984	0.997	0.00217578	0.994	0.002
23	SATVI	GroupB	2	2397	0.9115	0.908	0.915	0.00494975	0.9115	0.0035	13	14488	0.938846	0.908	0.972	0.0179854	0.94	0.024
23	SATVII	-	20	1864	0.92	0.904	0.946	0.0227156	0.91	0.021	20	1864	0.92	0.904	0.946	0.0227156	0.91	0.021
24	SATI	GroupA	3253	4560697	0.9585	0.958	0.959	0.000707107	0.9585	0.0005	3253	4560697	0.9585	0.958	0.959	0.000707107	0.9585	0.0005
24	SATI	GroupB	1919	2697479	0.925558	0.908	0.949	0.003476	0.925	0.005	1919	2697479	0.925558	0.908	0.949	0.003476	0.925	0.005
24	SATI	GroupC	54	75654	0.710111	0.664	0.762	0.0365592	0.725	0.06425	55	77731	0.709684	0.664	0.762	0.0355779	0.718	0.0635
24	SATIII	-	153	363452	0.762778	0.754	0.787	0.0138183	0.755	0.013	153	363452	0.762778	0.754	0.787	0.0138183	0.755	0.013
24	SATIV	-	197	657729	0.983485	0.971	0.989	0.00274091	0.983	0.002	197	657729	0.983485	0.971	0.989	0.00274091	0.983	0.002
24	SATV	-	53	73986	0.90078	0.877	0.928	0.012487	0.901	0.005	53	73986	0.90078	0.877	0.928	0.012487	0.901	0.005
24	SATVI	GroupA	786	903592	0.992212	0.985	0.997	0.00214373	0.993	0.003	786	903592	0.992212	0.985	0.997	0.00214373	0.993	0.003
24	SATVI	GroupB	NA	NA	NA	NA	NA	NA	NA	NA	9	9924	0.936778	0.911	0.958	0.014087	0.939	0.008
24	SATVII	-	NA	NA	NA	NA	NA	NA	NA	NA	3	228	0.791	0.784	0.798	0.00989949	0.791	0.007
25	SATI	GroupA	4720	6617997	0.955	0.955	0.955	NA	0.955	0	4720	6617997	0.955	0.955	0.955	NA	0.955	0
25	SATIII	-	63	150454	0.772	0.772	0.772	NA	0.772	0	63	150454	0.772	0.772	0.772	NA	0.772	0
25	SATV	-	11	16074	0.9192	0.905	0.93	0.00731513	0.9215	0.0025	11	16074	0.9192	0.905	0.93	0.00731513	0.9215	0.0025
25	SATVI	GroupB	NA	NA	NA	NA	NA	NA	NA	NA	5	5425	0.9428	0.928	0.969	0.0156589	0.939	0.008
26	SATI	GroupA	1840	2579257	0.954	0.954	0.954	NA	0.954	0	1840	2579257	0.954	0.954	0.954	NA	0.954	0
26	SATI	GroupB	684	962075	0.925676	0.911	0.935	0.0031968	0.925	0.003	684	962075	0.925676	0.911	0.935	0.0031968	0.925	0.003
26	SATI	GroupC	NA	NA	NA	NA	NA	NA	NA	NA	19	26642	0.6744	0.646	0.704	0.0189924	0.671	0.024
26	SATII	GroupA	676	459577	0.984	0.984	0.984	NA	0.984	0	676	459577	0.984	0.984	0.984	NA	0.984	0
26	SATII	GroupB	9	5539	0.677111	0.654	0.744	0.0286899	0.672	0.02	9	5539	0.677111	0.654	0.744	0.0286899	0.672	0.02
26	SATIII	-	453	1079662	0.804429	0.797	0.817	0.00734523	0.801	0.008	454	1082010	0.797125	0.746	0.817	0.0217482	0.801	0.0075
26	SATIV	-	343	1144670	0.985117	0.971	0.991	0.002803	0.986	0.004	343	1144670	0.985117	0.971	0.991	0.002803	0.986	0.004
26	SATV	-	135	196957	0.893672	0.879	0.975	0.0301525	0.879	0	135	196957	0.893672	0.879	0.975	0.0301525	0.879	0
26	SATVI	GroupA	381	439147	0.993165	0.985	0.997	0.0020148	0.993	0.003	381	439147	0.993165	0.985	0.997	0.0020148	0.993	0.003
26	SATVI	GroupB	NA	NA	NA	NA	NA	NA	NA	NA	12	13505	0.94375	0.912	0.966	0.0188541	0.9485	0.03
26	SATVII	-	19	1755	0.922	0.906	0.946	0.021166	0.914	0.02	19	1755	0.922	0.906	0.946	0.021166	0.914	0.02
27	SATI	GroupA	1295	1815033	0.959	0.959	0.959	NA	0.959	0	1295	1815033	0.959	0.959	0.959	NA	0.959	0
27	SATI	GroupB	126	177391	0.92	0.918	0.922	0.00282843	0.92	0.002	126	177391	0.92	0.918	0.922	0.00282843	0.92	0.002
27	SATI	GroupC	46	65843	0.66413	0.638	0.685	0.012256	0.662	0.017	47	67037	0.66575	0.638	0.703	0.0143746	0.664	0.01775
27	SATIII	-	2602	6210690	0.806737	0.776	0.831	0.0157086	0.807	0.0265	2602	6210690	0.806737	0.776	0.831	0.0157086	0.807	0.0265
27	SATV	-	404	583872	0.959077	0.895	0.984	0.0148501	0.96	0.019	404	583872	0.959077	0.895	0.984	0.0148501	0.96	0.019
27	SATVI	GroupB	1	1212	0.972	0.972	0.972	NA	0.972	0	7	7753	0.941571	0.898	0.972	0.0244735	0.943	0.024
28	SATI	GroupA	1539	2157607	0.958	0.958	0.958	NA	0.958	0	1539	2157607	0.958	0.958	0.958	NA	0.958	0
28	SATI	GroupC	6	7735	0.77	0.759	0.781	0.0155563	0.77	0.011	6	7735	0.77	0.759	0.781	0.0155563	0.77	0.011
28	SATII	GroupB	NA	NA	NA	NA	NA	NA	NA	NA	16	10146	0.69025	0.662	0.76	0.0284804	0.6815	0.01475
28	SATIII	-	2674	6385519	0.79375	0.671	0.828	0.0289465	0.794	0.02	2674	6385519	0.79375	0.671	0.828	0.0289465	0.794	0.02
28	SATV	-	270	397583	0.948111	0.868	0.987	0.0335721	0.963	0.053	270	397583	0.948111	0.868	0.987	0.0335721	0.963	0.053
28	SATVI	GroupB	NA	NA	NA	NA	NA	NA	NA	NA	10	10929	0.9337	0.921	0.945	0.00849902	0.9325	0.0125
29	SATI	GroupA	4076	5715280	0.958	0.955	0.961	0.00424264	0.958	0.003	4076	5715280	0.958	0.955	0.961	0.00424264	0.958	0.003
29	SATI	GroupB	483	679849	0.926574	0.916	0.934	0.00383683	0.926	0.004	483	679849	0.926574	0.916	0.934	0.00383683	0.926	0.004
29	SATI	GroupC	55	75677	0.672792	0.644	0.705	0.0169551	0.6755	0.0215	58	79195	0.67352	0.644	0.705	0.0169929	0.676	0.022
29	SATII	GroupB	4	2459	0.70375	0.689	0.725	0.0158193	0.7005	0.01725	10	5976	0.7875	0.689	0.844	0.0726579	0.843	0.13225
29	SATIV	-	118	388888	0.987415	0.971	0.993	0.00297949	0.988	0.003	118	388888	0.987415	0.971	0.993	0.00297949	0.988	0.003
29	SATVI	GroupA	267	307912	0.993408	0.986	0.997	0.00218376	0.994	0.003	267	307912	0.993408	0.986	0.997	0.00218376	0.994	0.003
29	SATVI	GroupB	NA	NA	NA	NA	NA	NA	NA	NA	11	12159	0.944182	0.925	0.971	0.0152106	0.94	0.0225

## Sheet: S8_MannWhitneyPvals
Supplmentary Table 8. Centromere vs Non-centromere methylation values across UOA_Wagyu_1_Y using ONT and PacBio data
100kb Window	50kb Step						100kb Window	50kb Step	chm13v2.0_hg002_5mC_hifi_revio_modkit0.1.11				100kb Window	50kb Step	chm13v2.0_CHM13_CpG_ont_guppy3.6.0_nanopolish0.13.2				100kb Window	50kb Step	chm13v2.0_hg002_CpG_ont_guppy6.1.2
chromosome	tech	centromere_median	non_centromere_median	pvalue	adjusted_pvalue		chromosome	centromere_median	non_centromere_median	pvalue	adjusted_pvalue		chromosome	centromere_median	non_centromere_median	pvalue	adjusted_pvalue		chromosome	centromere_median	non_centromere_median	pvalue	adjusted_pvalue
1	ONT	89.47	91.82	1.60018e-71	7.73419e-71		chr1	75.4	61.36	1.11439e-31	6.68632e-31		chr1	0.246	0.4845	4.58862e-06	8.11834e-06		chr1	0.847726	0.786825	0.000116704	0.000175056
2	ONT	92.86	91.97	0.301791	0.301791		chr2	60.585	57.805	0.846146	0.846146		chr2	0.466	0.448	0.881146	0.881146		chr2	0.756757	0.768124	0.000937425	0.00118412
3	ONT	88.89	92.54	1.86054e-100	2.69778e-99		chr3	50.53	59.045	3.54072e-37	2.83258e-36		chr3	0.098	0.407	4.21031e-37	1.93674e-36		chr3	0.681818	0.77037	4.91351e-42	3.93081e-41
4	ONT	90.48	92.31	1.7568e-18	2.2151e-18		chr4	53.03	54.55	0.0019231	0.00271497		chr4	0.373	0.3445	0.437175	0.478811		chr4	0.685039	0.739649	2.0712e-12	4.14241e-12
5	ONT	88.64	92.59	1.25118e-68	3.62842e-68		chr5	55.96	57.32	3.23829e-05	5.97838e-05		chr5	0.123	0.397	1.34042e-11	3.08298e-11		chr5	0.698921	0.753698	1.83614e-12	4.00613e-12
6	ONT	88	91.11	1.72643e-47	2.94509e-47		chr6	57.34	60.335	0.00720165	0.0096022		chr6	0.351	0.379	0.00836242	0.0113139		chr6	0.74094	0.78125	2.63029e-05	4.20847e-05
7	ONT	88.89	92.06	6.41969e-70	2.06857e-69		chr7	61.11	58.985	0.636487	0.664161		chr7	0.213	0.4425	4.5669e-07	8.75323e-07		chr7	0.80383	0.780822	0.495256	0.516789
8	ONT	88.89	92.215	1.2942e-70	5.36168e-70		chr8	53.1225	54.6825	0.568553	0.62024		chr8	0.471	0.28825	0.0097753	0.0124907		chr8	0.718909	0.745269	0.0863331	0.0986664
9	ONT	89.47	92.16	4.20479e-76	2.43878e-75		chr9	66.1	59.04	3.42139e-14	1.02642e-13		chr9	0.097	0.4385	2.18307e-123	5.02105e-122		chr9	0.666667	0.782609	2.16442e-94	5.1946e-93
10	ONT	88.955	92.96	2.8726e-87	2.08263e-86		chr10	59.7	59.055	0.469393	0.536449		chr10	0.466	0.317	0.122602	0.140992		chr10	0.768139	0.774746	0.0170333	0.02044
11	ONT	87.5	92.86	1.34308e-48	2.43433e-48		chr11	51.28	56.89	3.85398e-07	7.70797e-07		chr11	0.357	0.333	0.000322571	0.000475535		chr11	0.666667	0.75	1.5649e-16	3.75576e-16
12	ONT	88.89	91.84	7.40759e-60	1.79017e-59		chr12	61.54	62.5	0.185083	0.222099		chr12	0.138	0.465	3.99003e-08	8.34278e-08		chr12	0.788618	0.8	0.374428	0.408467
13	ONT	89.66	92.86	5.64707e-51	1.16975e-50		chr13	50	54.55	2.68337e-12	6.44008e-12		chr13	0.11425	0.159	2.24424e-05	3.68696e-05		chr13	0.616859	0.739855	1.61187e-31	9.67122e-31
14	ONT	90.48	91.89	9.67782e-07	1.07945e-06		chr14	52.3	58.71	3.78649e-17	1.51459e-16		chr14	0.114	0.3155	2.8809e-27	1.10434e-26		chr14	0.684525	0.77012	2.53824e-30	1.21835e-29
15	ONT	89.29	92	5.58132e-36	8.51885e-36		chr15	57.5	61.965	1.57094e-13	4.18917e-13		chr15	0.096	0.5065	1.83333e-87	2.10833e-86		chr15	0.763158	0.79925	2.20505e-18	5.88014e-18
16	ONT	88	92.75	1.33721e-59	2.983e-59		chr16	71.93	62.775	8.70681e-05	0.00014926		chr16	0.111	0.462	2.55839e-18	7.35538e-18		chr16	0.808511	0.803102	0.87562	0.87562
17	ONT	89.19	91.67	3.77345e-50	7.29534e-50		chr17	61.82	69.2775	0.000196984	0.000295477		chr17	0.438	0.6355	0.000330807	0.000475535		chr17	0.769231	0.847092	9.03692e-08	1.66835e-07
18	ONT	90	92.085	7.17472e-23	1.04033e-22		chr18	61.11	53.42	1.72653e-21	8.28734e-21		chr18	0.606	0.219	1.93203e-13	4.93741e-13		chr18	0.807229	0.725579	2.40677e-22	8.25179e-22
19	ONT	90.48	93.05	1.11193e-19	1.53552e-19		chr19	56	71.63	4.02202e-41	4.82643e-40		chr19	0.2135	0.6105	1.45459e-37	8.36391e-37		chr19	0.77305	0.872412	1.57235e-21	4.71706e-21
21	ONT	88.89	91.67	7.85005e-63	2.06956e-62		chr20	57.33	59.265	0.0244786	0.0309203		chr20	0.27	0.2775	0.636773	0.665718		chr20	0.737034	0.763314	0.000307278	0.000433804
22	ONT	86.67	92.86	2.8296e-87	2.08263e-86		chr21	50	55.9675	3.24706e-15	1.11328e-14		chr21	0.10075	0.3585	9.12333e-24	2.99766e-23		chr21	0.656483	0.756456	2.84622e-23	1.13849e-22
23	ONT	90.48	92.455	6.47178e-17	7.82007e-17		chr22	51.83	69.23	6.32733e-63	1.51856e-61		chr22	0.105	0.564	9.90645e-56	7.59495e-55		chr22	0.675898	0.84252	1.18375e-73	1.4205e-72
24	ONT	90.74	92.11	9.18767e-05	9.86824e-05		chrX	60.71	54.55	1.92979e-08	4.21046e-08		chrX	0.1775	0.125	0.0218562	0.0264575		chrX	0.793478	0.765251	0.00087973	0.00117297
25	ONT	90.91	92.175	8.12934e-09	9.43004e-09		chrY	46.67	61.05	0.000111509	0.000178414		chrY	missing	missing	missing	missing		chrY	0.675962	0.810345	1.31275e-07	2.25043e-07
26	ONT	90.48	92.45	1.10476e-18	1.45628e-18		genome_wide	59.2575	58.685	1.27739e-11			genome_wide	0.14675	0.377	1.00686e-217			genome_wide	0.738247	0.774648	7.71556e-162
27	ONT	88.89	91.4375	5.12248e-47	8.25288e-47
28	ONT	88	92.42	5.3448e-70	1.93749e-69
29	ONT	90.28	91.07	0.00145528	0.00150725
Genome-wide	ONT	89.47	92.16
X	ONT	80	91.18	1.0332e-109	2.99627e-108
1	PacBio	92.4	93.75	4.39464e-94	4.24815e-93
2	PacBio	93.1	93.6	5.86245e-16	8.09577e-16
3	PacBio	91.4	93.6	2.614e-79	1.89515e-78
4	PacBio	93.1	93.8	7.82357e-20	1.13442e-19
5	PacBio	91.9	93.6	4.76026e-46	8.62797e-46
6	PacBio	91.375	93.4	1.45563e-72	5.27668e-72
7	PacBio	90.9	93.4	8.31133e-61	2.19117e-60
8	PacBio	91.7	93.7	7.80786e-79	4.52856e-78
9	PacBio	92.2	93.8	4.80969e-96	6.97404e-95
10	PacBio	91.9	93.9	5.69906e-70	1.65273e-69
11	PacBio	90.8	93.6	2.97061e-40	5.0675e-40
12	PacBio	91.6	93.4	1.44861e-52	3.2315e-52
13	PacBio	92	93.7	4.79263e-40	7.72147e-40
14	PacBio	92.9	93.6	2.67628e-05	3.23383e-05
15	PacBio	91.9	93.5	2.78236e-39	4.24675e-39
16	PacBio	90.8	93.7	4.84338e-49	9.36388e-49
17	PacBio	92	93.3	1.75635e-51	3.63815e-51
18	PacBio	92.3	93.2	1.03866e-12	1.36914e-12
19	PacBio	92.8	93.5	4.56175e-06	5.75177e-06
21	PacBio	91.1	93.4	1.74606e-70	5.6262e-70
22	PacBio	91	93.7	1.05352e-75	4.3646e-75
23	PacBio	93.4	93.5	0.339007	0.351115
24	PacBio	93	93.5	0.000481623	0.000537195
25	PacBio	93.2	93.2	0.713196	0.713196
26	PacBio	93.1	93.5	0.000134869	0.000156449
27	PacBio	91.6	93.3	5.4764e-53	1.32346e-52
28	PacBio	91	93.6	4.91818e-77	2.37712e-76
29	PacBio	92.8	93.05	0.0602854	0.064751
Genome-wide	PacBio	92.1	93.6
X	PacBio	86.85	93.5	2.77722e-111	8.05393e-110
1Mb Window	500kb Step
chromosome	tech	centromere_median	non_centromere_median	pvalue	adjusted_pvalue
1	ONT	89.66	92.415	7.11841e-11	2.94906e-10
2	ONT	93.1	92.19	0.651528	0.651528
3	ONT	87.585	92.86	2.43396e-14	7.05848e-13
4	ONT	90.48	92.54	0.00417189	0.0048394
5	ONT	87.84	92.75	2.19837e-10	7.08362e-10
6	ONT	88.24	91.67	3.86341e-07	6.22439e-07
7	ONT	87.69	92.06	1.29074e-11	6.23859e-11
8	ONT	88.24	92.65	1.09555e-10	3.97137e-10
9	ONT	89.47	92.565	7.28288e-12	4.22407e-11
10	ONT	88	93.33	5.32666e-13	5.14911e-12
11	ONT	87.1	93.225	2.96507e-07	5.05806e-07
12	ONT	88.89	92.31	6.08138e-10	1.60327e-09
13	ONT	88.89	93.06	3.5279e-08	7.3078e-08
14	ONT	90.48	92.31	0.0447857	0.0481032
15	ONT	89.19	92.31	3.54163e-06	5.40564e-06
16	ONT	88.24	92.98	2.12839e-09	5.14362e-09
17	ONT	88.46	92.45	7.66265e-08	1.48145e-07
18	ONT	89.66	92.31	0.00010798	0.000156572
19	ONT	90.36	93.22	0.000319862	0.000421636
21	ONT	88.46	92.19	4.4167e-10	1.28084e-09
22	ONT	87.5	93.22	3.19503e-12	2.3164e-11
23	ONT	90.48	92.73	0.000211511	0.000292087
24	ONT	90.62	92.59	0.0409407	0.0456646
25	ONT	90.91	93.02	0.00220612	0.00266573
26	ONT	90	93.1	0.000776222	0.000978715
27	ONT	88.64	91.89	2.21024e-07	4.00606e-07
28	ONT	88	92.65	5.28453e-09	1.17886e-08
29	ONT	90.27	91.39	0.120718	0.125029
Genome-wide	ONT	89.29	92.55
X	ONT	79.49	91.67	5.55768e-14	8.05864e-13
1	PacBio	92.8	93.9	2.10804e-14	2.03778e-13
2	PacBio	93	93.6	0.000449186	0.000620304
3	PacBio	91.1	93.7	4.98342e-14	3.61298e-13
4	PacBio	93.1	93.9	1.07693e-05	1.56155e-05
5	PacBio	91.3	93.5	1.88606e-10	4.55799e-10
6	PacBio	91.8	93.5	2.15287e-12	1.04056e-11
7	PacBio	91	93.3	9.45374e-11	2.49235e-10
8	PacBio	91.2	93.8	1.72342e-12	9.99581e-12
9	PacBio	92.4	93.9	2.38013e-16	6.90237e-15
10	PacBio	91.1	93.8	7.01735e-12	2.54379e-11
11	PacBio	90.7	93.7	1.42549e-07	2.29663e-07
12	PacBio	92.3	93.5	9.14117e-08	1.55938e-07
13	PacBio	91.6	93.75	8.5892e-08	1.55679e-07
14	PacBio	92.9	93.7	0.0389175	0.0490699
15	PacBio	91.1	93.7	2.83077e-07	4.32064e-07
16	PacBio	90.7	93.8	6.869e-08	1.32801e-07
17	PacBio	91.7	93.4	8.40723e-09	1.7415e-08
18	PacBio	92.2	93.1	0.00106042	0.00139783
19	PacBio	92.7	93.4	0.0481803	0.0582179
21	PacBio	90.7	93.3	1.00916e-11	2.92657e-11
22	PacBio	90.5	93.8	4.33189e-12	1.79464e-11
23	PacBio	93.2	93.6	0.343546	0.383186
24	PacBio	92.9	93.7	0.145294	0.168541
25	PacBio	93.2	93.4	0.593162	0.614347
26	PacBio	93.4	93.6	0.965691	0.965691
27	PacBio	91.6	93.4	7.89759e-10	1.76177e-09
28	PacBio	91	93.7	9.91162e-12	2.92657e-11
29	PacBio	92.7	93	0.359549	0.386182
Genome-wide	PacBio	92	93.6
X	PacBio	86.3	93.6	1.10766e-14	1.60611e-13
5Mb Window	2.5Mb Step
chromosome	tech	centromere_median	non_centromere_median	pvalue	adjusted_pvalue
1	ONT	89.47	92.42	0.00145791	0.00704657
2	ONT	93.03	92.305	0.38223	0.410543
3	ONT	88.645	92.495	0.000971317	0.00704657
4	ONT	90.7	92.65	0.120659	0.166624
5	ONT	88.89	92.65	0.0119756	0.0248066
6	ONT	88.46	91.685	0.00739862	0.0165046
7	ONT	88.24	92.24	0.000475949	0.00690126
8	ONT	87.94	92.74	0.00136635	0.00704657
9	ONT	89.18	92.31	0.00119871	0.00704657
10	ONT	88.595	93.03	0.00285079	0.0114088
11	ONT	88.46	93.125	0.154212	0.194441
12	ONT	88.46	92.31	0.00314725	0.0114088
13	ONT	88.855	92.86	0.0247171	0.0447997
14	ONT	90	92.54	0.148653	0.194441
15	ONT	89.015	92.7	0.0781123	0.119224
16	ONT	88.46	93.33	0.00649973	0.0165046
17	ONT	88.715	91.9	0.0214665	0.041502
18	ONT	90	92.185	0.255887	0.285412
19	ONT	90.465	93.02	0.177502	0.214481
21	ONT	88.57	92.31	0.00442183	0.0128233
22	ONT	88.24	93.04	0.00718641	0.0165046
23	ONT	90.48	92.68	0.0757018	0.119224
24	ONT	90.96	92.54	0.46427	0.46427
25	ONT	90.91	92.86	0.224067	0.259918
26	ONT	87.5	92.53	0.113169	0.164095
27	ONT	88	91.645	7.5287e-05	0.00218332
28	ONT	88.46	92.185	0.0317639	0.0541854
29	ONT	90.41	91.54	0.406552	0.421072
Genome-wide	ONT	88.89	92.5
X	ONT	79.31	91.43	0.00372932	0.0120167
1	PacBio	92.8	93.9	0.00019882	0.00288288
2	PacBio	92.75	93.6	0.0838245	0.121545
3	PacBio	91.35	93.5	0.00121119	0.00585411
4	PacBio	92.6	93.8	0.00263016	0.00897899
5	PacBio	91.6	93.6	0.00839856	0.0178545
6	PacBio	91.2	93.5	0.00051231	0.00495233
7	PacBio	91	93.3	0.00322407	0.00897899
8	PacBio	91.55	93.85	0.00103837	0.00585411
9	PacBio	91.95	93.9	0.000176937	0.00288288
10	PacBio	92	93.9	0.00297679	0.00897899
11	PacBio	91.3	93.65	0.13158	0.181705
12	PacBio	91.7	93.6	0.00925041	0.0178841
13	PacBio	91.5	93.6	0.0266647	0.0454868
14	PacBio	92.3	93.7	0.147134	0.19395
15	PacBio	91.55	93.7	0.0411076	0.0627432
16	PacBio	90.7	93.8	0.00348062	0.00897899
17	PacBio	91.7	93.5	0.0137655	0.0249501
18	PacBio	92.4	93.1	0.590358	0.618248
19	PacBio	92.8	93.3	0.478826	0.546712
21	PacBio	90.6	93.5	0.00248039	0.00897899
22	PacBio	91.4	93.7	0.00861942	0.0178545
23	PacBio	93.3	93.7	0.391688	0.47329
24	PacBio	93.2	93.7	0.490155	0.546712
25	PacBio	93.3	93.6	0.861908	0.861908
26	PacBio	92.8	93.5	0.364644	0.459768
27	PacBio	90.9	93.4	0.000751684	0.00544971
28	PacBio	91.3	93.65	0.0312577	0.0503596
29	PacBio	92.9	93.25	0.596929	0.618248
Genome-wide	PacBio	91.8	93.6
X	PacBio	85.9	93.5	0.00371544	0.00897899

## Sheet: S9_CentromereCPGs
Supplmentary Table 9. Observed and Expected C and G counts from UOA_Wagyu_1_Y centromere
chromosome	CpG_count	C_count	G_count	Exp_CpG_count	Rel_Freq_CpG	Obs_Exp_CpG
1	1088967	6474115	5197481	1.60234e+06	5.18556	0.679611
2	520371	2570611	2361162	674403	5.7819	0.771602
3	882258	5434390	4686887	1.34055e+06	4.64346	0.658133
4	945060	5294638	3952574	1.30797e+06	5.90663	0.722542
5	513999	3218360	2682838	784940	4.67272	0.654826
6	627147	4135067	3636129	1.00238e+06	4.18098	0.625661
7	662944	4117252	3661183	1.00493e+06	4.41963	0.659689
8	588477	3631506	3325565	928985	4.52675	0.633462
9	1191736	6976019	5876906	1.7825e+06	5.18146	0.668577
10	682575	4136181	3560943	1.05205e+06	4.87554	0.648805
11	298576	1968664	1680955	472748	4.26537	0.631575
12	876021	5556022	5011119	1.39209e+06	4.38011	0.629283
13	382080	2353786	1959907	576650	4.776	0.662585
14	191211	1039096	765475	265134	6.3737	0.721186
15	374813	2329989	1968250	573250	4.68516	0.653839
16	616141	4137414	3600088	993004	4.10761	0.620482
17	684784	4195569	3504200	1.05015e+06	4.89131	0.652082
18	395157	2255073	1756695	565925	5.6451	0.69825
19	324365	1753078	1258342	441194	6.4873	0.735198
21	749962	4559540	4036865	1.15039e+06	4.68726	0.65192
22	502111	3150211	2814454	806011	4.56465	0.622958
23	723246	4411978	3479960	1.09668e+06	5.16604	0.659487
24	499637	2934654	2216103	722611	5.55152	0.691433
25	383217	2082541	1520183	527641	6.38695	0.726284
26	342091	2128944	1758699	534882	4.88701	0.639564
27	667532	4452738	4282956	1.12182e+06	3.92666	0.595046
28	500481	3225059	2934313	788611	4.17068	0.634636
29	407830	2329418	1752644	583234	5.82614	0.699256
X	112781	2978336	2988355	635738	0.805579	0.177402
20	NA	NA	NA	NA	NA	NA
Y	NA	NA	NA	NA	NA	NA

## Sheet: S10_XCentromereCpGs
Supplementary Table 10. Comparison of centromeric C and G counts across seven species
chromosome	CpG_count	C_count	G_count	Exp_CpG_count	Rel_Freq_CpG	Assembly	Region	Obs_vs_Exp
chrX	92706	2547517	2554292	542259	0.77255	UOA_Wagyu_1	Centromere	0.170963
chrX	133341	2656048	2559037	518575	1.01733	hs1	Centromere	0.257129
chrX	92621	1548295	1422537	294490	1.2384	B_orangutan	Centromere	0.314514
chrX	100904	1159623	1310179	242799	1.61253	Gorilla	Centromere	0.415586
chrX	45299	596813	539497	113462	1.59628	Bonobo	Centromere	0.399245
chrX	33165	509066	457290	96941	1.38109	Chimpanzee	Centromere	0.342115
chrX	124825	1935127	1750427	368624	1.35841	S_orangutan	Centromere	0.338624

[truncated: 26 more sheets: S11_PARGenesX, S12_PARgenesY, S13_outPARcattle, S14_ProteinBlastP, S15_GeneExpression, S16_PARGeneExpressionX, S17_PARGeneEpressionY, S18_NewGenes, S19_XCentromereGenes, S20_Testis_X_Cetromere, S21_MappingWvsWoCtr, S22_ShortReadsMapping, S23_ShortReadsSNPs, S24_SVtypes, S25_SVlocations, S26_SVgenes, S27_RawReads, S28_BovineSats, S29_TestisGeneExp, S30_GC_content_info …]
